# Supplementary material
Source: PubMed Central journal article supplement (PMC6358665)
Supplement: pnas.1817078116.sapp.pdf [file pnas.1817078116.sapp.pdf]

## Supplementary Information for

### **PP2C phosphatases promote autophagy by dephosphorylation of the Atg1 complex**

Gonen Memisoglu <sup>a,b</sup>, Vinay V. Eapen <sup>a,b,1</sup>, Ying Yang <sup>c,d</sup>, Daniel J. Klionsky <sup>c,d</sup> and James E. Haber <sup>a,b,2</sup>

<sup>2</sup>To whom correspondence should be addressed. Email: [haber@brandeis.edu](mailto:haber@brandeis.edu).

#### **This PDF file includes:**

Figures S1 to S9  
Tables S1 to S3

Fig. S1. GFP-Atg8 localization in WT and *ptc2* $\Delta$  *ptc3* $\Delta$  strains 4 h after MMS or rapamycin treatment.

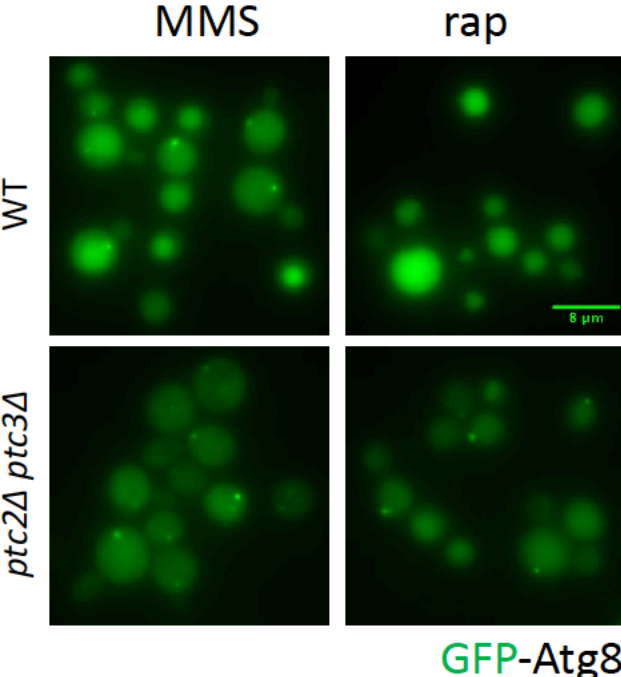

Fig. S2. Atg1-GFP, Atg11-GFP and Atg13-GFP localization in WT and *ptc2* $\Delta$  *ptc3* $\Delta$  strains under nutrient-replete conditions.

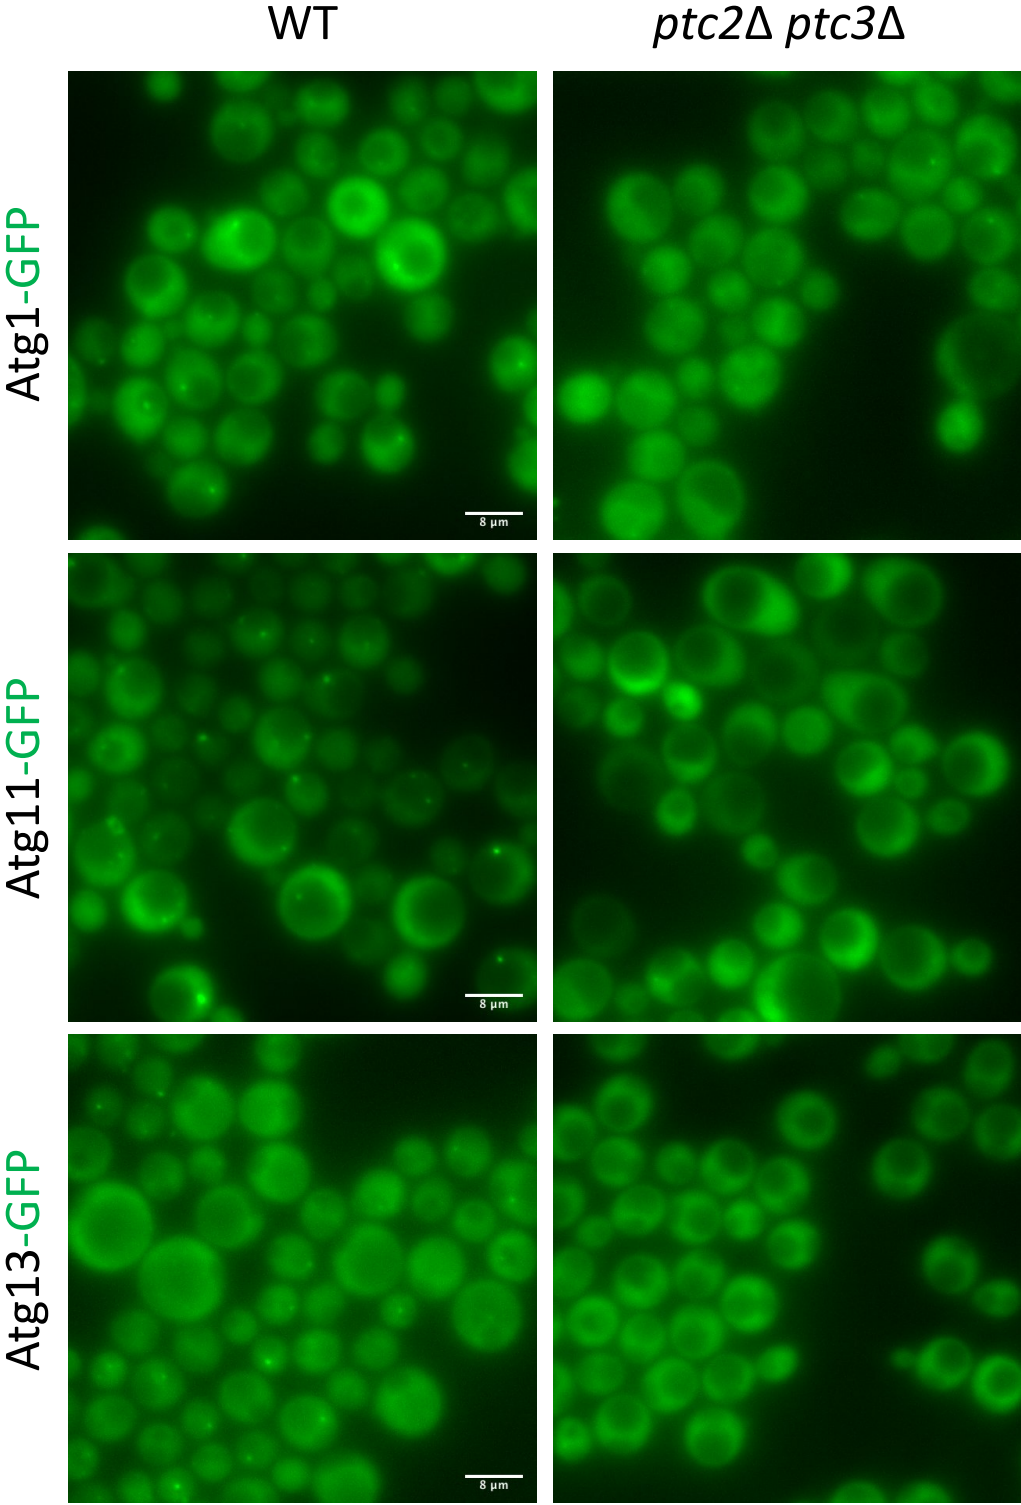

Fig. S3. Atg1-GFP, Atg13-GFP and Atg17-GFP localization in WT and *ptc2Δ ptc3Δ* mutant strains 4 h after rapamycin treatment.

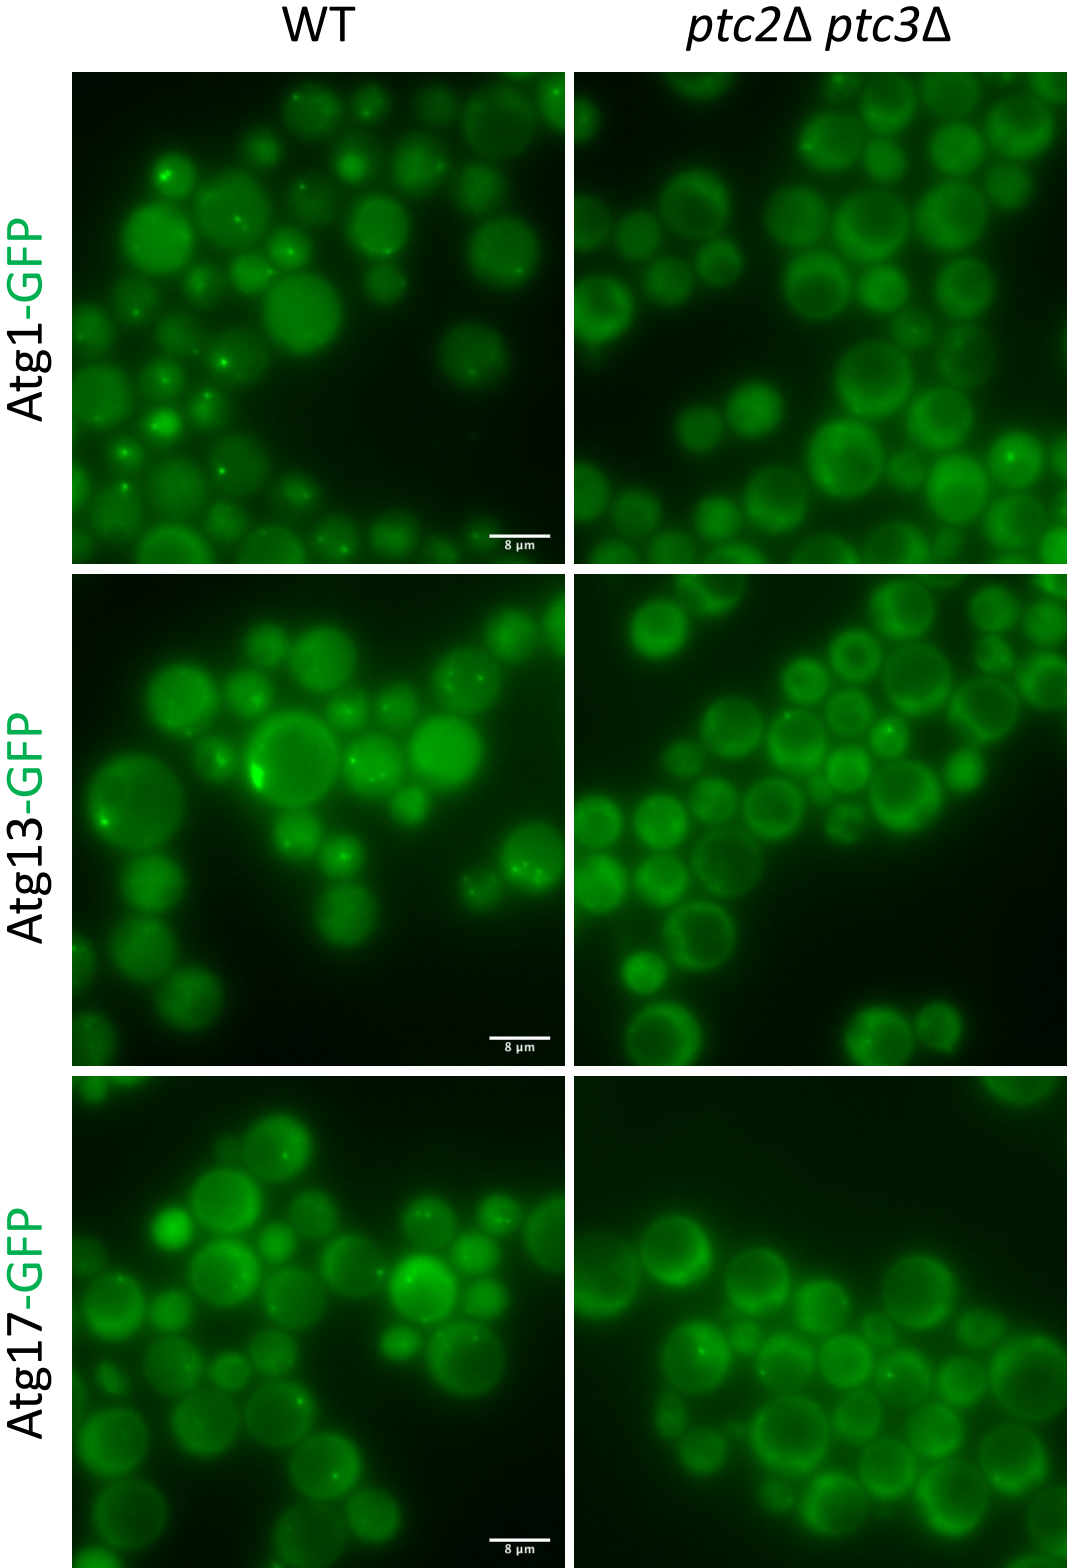

Fig. S4. Atg11-GFP and mCherry-Atg8 localization in WT and *ptc2Δ ptc3Δ* mutant strains 4 h after rapamycin treatment. Percentage of cells with visible Atg11 foci were counted and plotted.

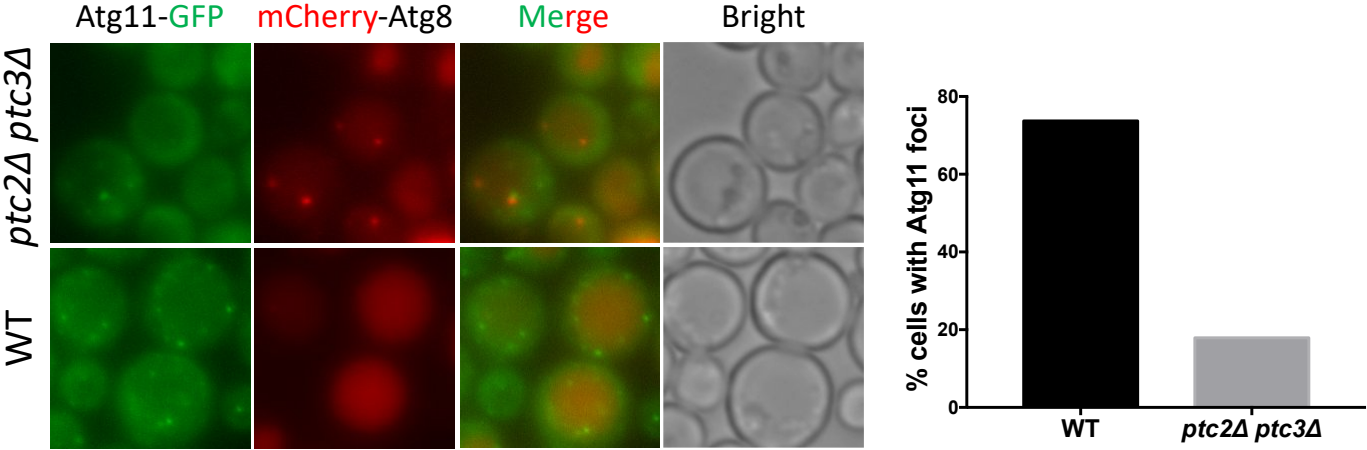

**Fig. S5. Sch9 phosphorylation in WT and *ptc2Δ ptc3Δ* strains 4 h after MMS, rapamycin or CHX treatment. Samples were collected as explained previously and blotted with anti-Sch9 antibody.**

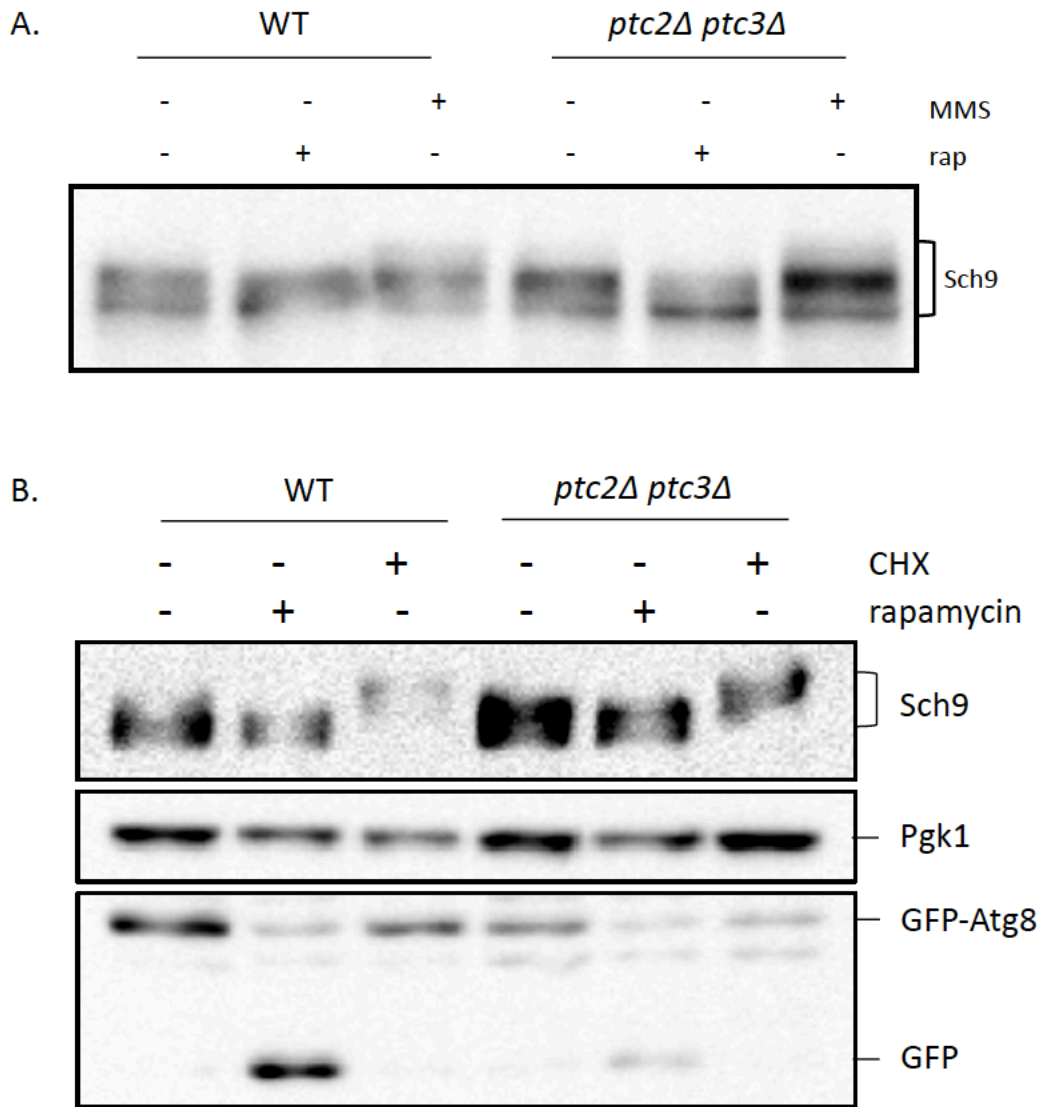

Fig. S6. Atg1 hyperphosphorylation in WT, *atg13Δ*, *ptc2Δ*, *ptc3Δ* and *ptc2Δ ptc3Δ* strains. Cells were treated with rapamycin and MMS for 4 h, as previously explained. Samples were collected and analyzed by blotting.

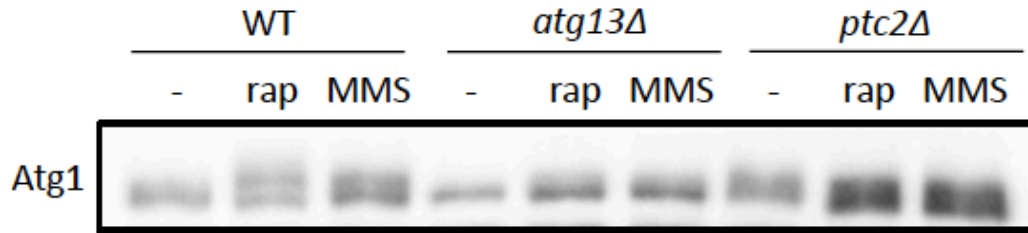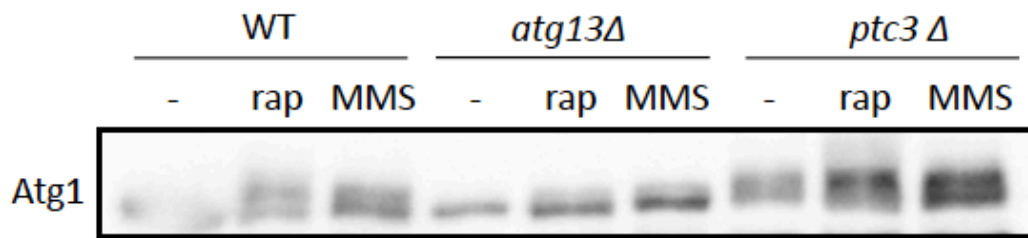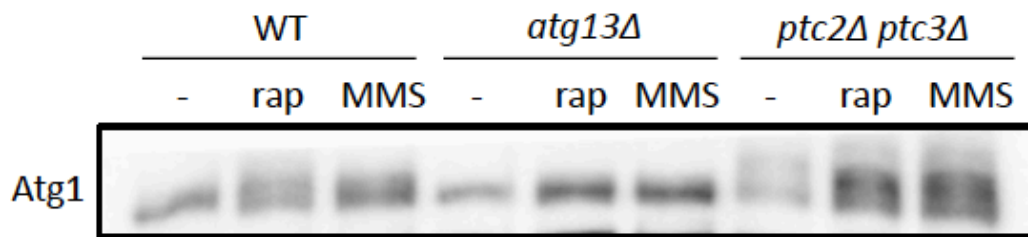

Fig S7. Atg1 hyperphosphorylation in WT, *ape1* $\Delta$ , *atg19* $\Delta$ , *ptc2* $\Delta$  *ptc3* $\Delta$ , *ape1* $\Delta$  *ptc2* $\Delta$  *ptc3* $\Delta$  and *atg19* $\Delta$  *ptc2* $\Delta$  *ptc3* $\Delta$  mutant strains. Cells were treated with rapamycin as previously explained and blotted for FLAG, Pgk1 (loading control) and GFP.

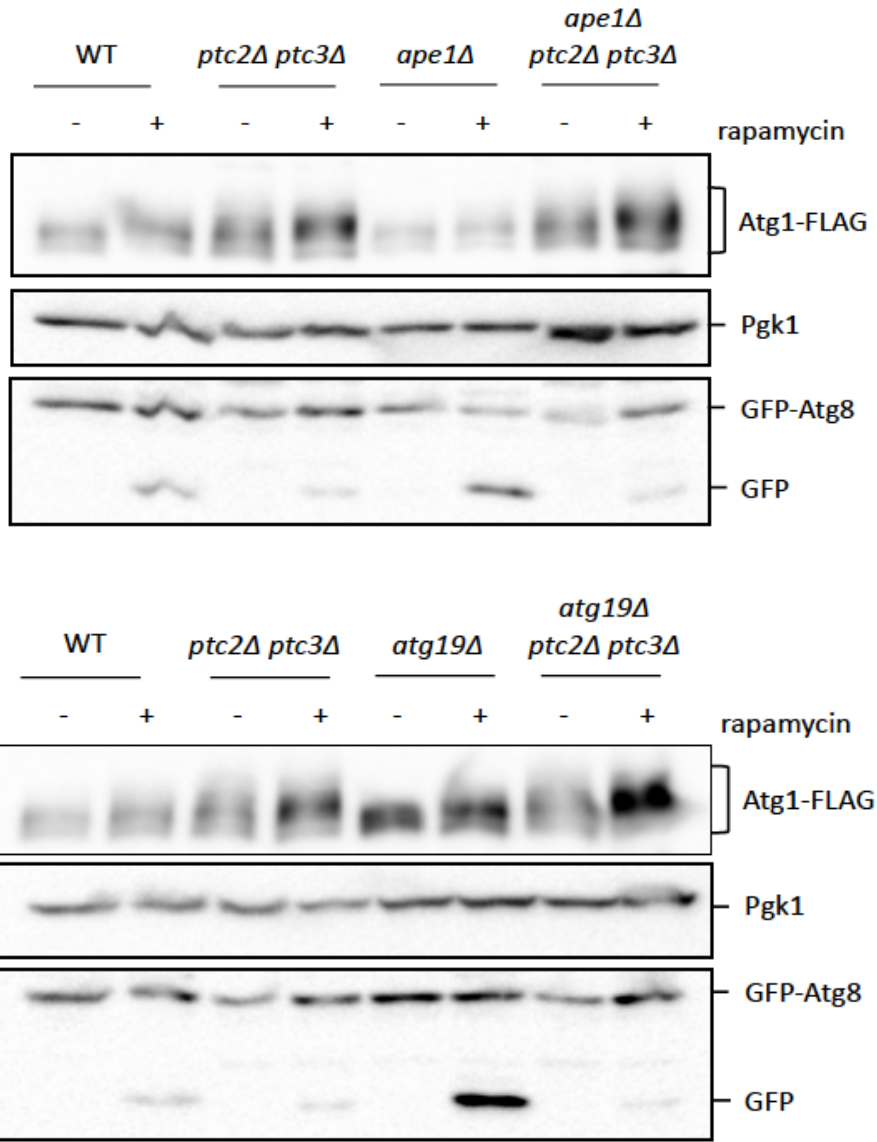



**Fig. S8. Atg1 hyperphosphorylation in WT, *atg1-S34A*, *atg1-S34D*, *atg1-S390A*, *atg1-S34A,S390A*, *ptc2Δ ptc3Δ atg1-S34A*, *ptc2Δ ptc3Δ atg1-S34D*, *ptc2Δ ptc3Δ atg1-S390A* and *ptc2Δ ptc3Δ atg1S34A,S390A* mutant strains 4 h after rapamycin treatment. Samples were blotted for Pgk1 as loading control and for GFP to measure percent GFP-Atg8 cleavage as previously described.**

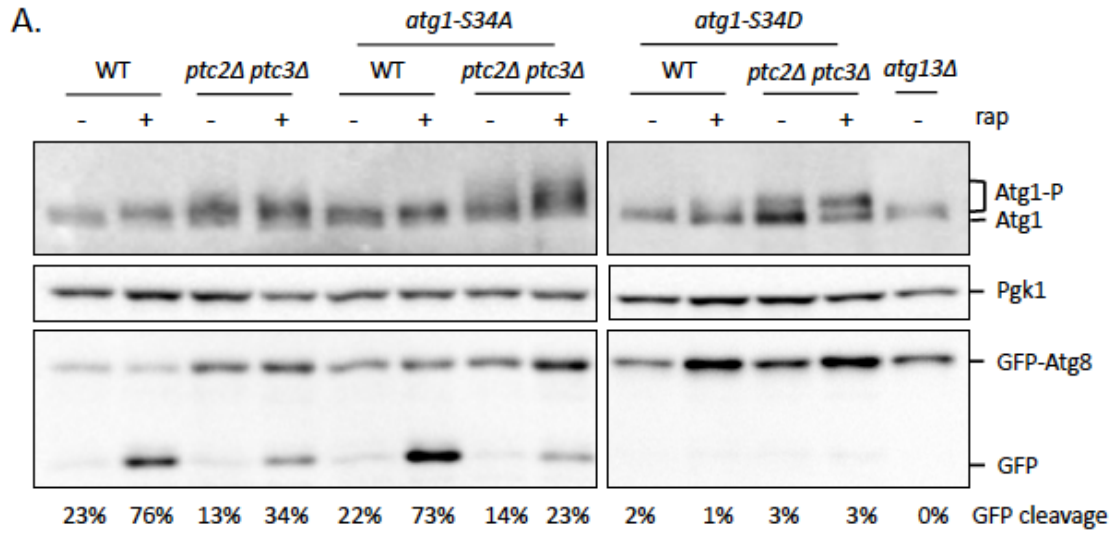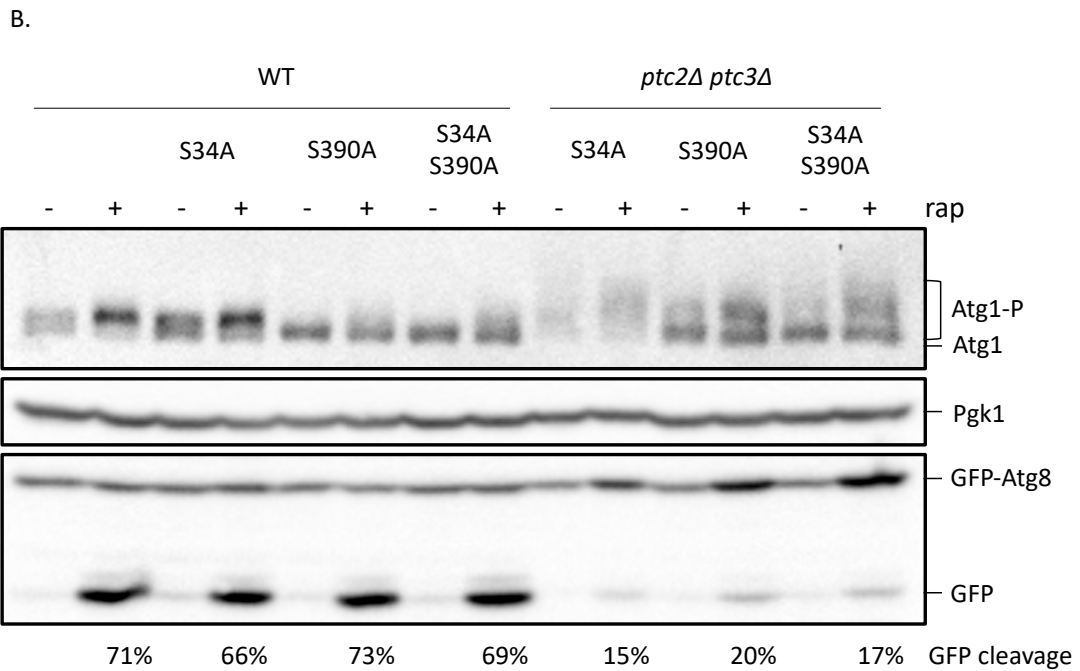

Fig. S9. Atg13 and Atg1 hyperphosphorylation in WT, *ptc2Δ ptc3Δ* and *atg1-T226A* mutant strains 4 h after rapamycin treatment. Samples were also blotted for Pgk1 for loading control and GFP to measure percent GFP-Atg8 cleavage.

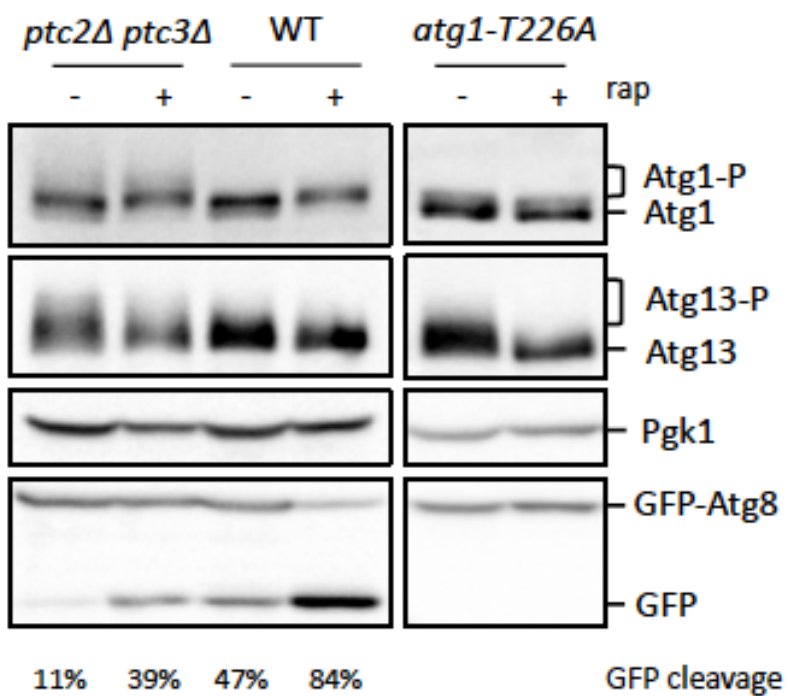

**Table S1. Yeast strains used in this study.**

| <b>Yeast strain</b> | <b>Genotype</b>                                                                                                                                                                  | <b>Source</b>       |
|---------------------|----------------------------------------------------------------------------------------------------------------------------------------------------------------------------------|---------------------|
| JKM179              | <i>MAT<math>\alpha</math>, ho<math>\Delta</math>, hml<math>\Delta</math>::ADE1, hmr<math>\Delta</math>::ADE1, ade1-100, leu2,3-112, lys5, trp1::hisG, ura3-52, ade3::GAL::HO</i> | Lee et. al, 1998    |
| FD529               | JKM179 <i>ptc3<math>\Delta</math>::KAN bar1<math>\Delta</math>::ADE3</i>                                                                                                         | This study          |
| VE213               | JKM179 <i>GFP::Atg8::URA3</i>                                                                                                                                                    | Eapen et. al, 2017  |
| GM187               | JKM179 <i>ptc2<math>\Delta</math>::NAT</i>                                                                                                                                       | This study          |
| GM189               | JKM179 <i>ptc2<math>\Delta</math>::NAT ptc3<math>\Delta</math>::KAN bar1<math>\Delta</math>::ADE3</i>                                                                            | This study          |
| GM207               | JKM179 <i>ptc2<math>\Delta</math>::NAT ptc3<math>\Delta</math>::KAN bar1<math>\Delta</math>::ADE3 GFP::Atg8::URA3</i>                                                            | This study          |
| GM221               | JKM179 [GFP-ATG8::URA3]                                                                                                                                                          | This study          |
| GM223               | JKM179 <i>ptc2<math>\Delta</math>::NAT [GFP-ATG8::URA3]</i>                                                                                                                      | This study          |
| GM224               | JKM179 <i>ptc3<math>\Delta</math>::KAN bar1<math>\Delta</math>::ADE3 [GFP-ATG8::URA3]</i>                                                                                        | This study          |
| GM225               | JKM179 <i>ptc2<math>\Delta</math>::NAT ptc3<math>\Delta</math>::KAN bar1<math>\Delta</math>::ADE3 [GFP-ATG8::URA3]</i>                                                           | This study          |
| VDY630              | BY4741 <i>atg1<math>\Delta</math>::2x-FLAG-ATG1</i>                                                                                                                              | Kamber et. al, 2015 |
| GM261               | VDY630 <i>ptc2<math>\Delta</math>::NAT ptc3<math>\Delta</math>::HPH</i>                                                                                                          | This study          |
| GM262               | VDY630 <i>atg13<math>\Delta</math>::HPH</i>                                                                                                                                      | This study          |
| GM264               | JKM179 <i>GFP-Atg8::LEU2</i>                                                                                                                                                     | This study          |
| GM265               | JKM179 <i>ptc2<math>\Delta</math>::NAT GFP-Atg8::LEU2</i>                                                                                                                        | This study          |
| GM266               | JKM179 <i>ptc3<math>\Delta</math>::HPH GFP-Atg8::LEU2</i>                                                                                                                        | This study          |
| GM267               | JKM179 <i>ptc2<math>\Delta</math>::NAT ptc3<math>\Delta</math>::KAN GFP-Atg8::LEU2</i>                                                                                           | This study          |
| GM281               | VDY630 <i>GFP-Atg8::LEU2</i>                                                                                                                                                     | This study          |

|       |                                                                                    |            |
|-------|------------------------------------------------------------------------------------|------------|
| GM282 | VDY630 <i>ptc2Δ::NAT GFP-Atg8::LEU2</i>                                            | This study |
| GM283 | VDY630 <i>ptc3Δ::HPH GFP-Atg8::LEU2</i>                                            | This study |
| GM284 | VDY630 <i>ptc2Δ::NAT ptc3Δ::HPH GFP-Atg8::LEU2</i>                                 | This study |
| GM285 | VDY630 <i>atg13Δ::HPH GFP-Atg8::LEU2</i>                                           | This study |
| GM287 | VDY630 <i>ptc2Δ::NAT ptc3Δ::HPH atg13Δ::KAN GFP-Atg8::LEU2</i>                     | This study |
| GM302 | JKM179 <i>Atg13::13xmyc::TRP1 GFP-Atg8::LEU2</i>                                   | This study |
| GM341 | JKM179 <i>Atg13::13xmyc::TRP1 GFP-Atg8::LEU2 ptc2Δ::NAT ptc3Δ::HPH</i>             | This study |
| GM477 | VDY630 <i>atg1-S34A GFP-Atg8::LEU2</i>                                             | This study |
| GM478 | VDY630 <i>atg1-S34D GFP-Atg8::LEU2</i>                                             | This study |
| GM480 | VDY630 <i>atg1-T226A GFP-Atg8::LEU2</i>                                            | This study |
| GM494 | VDY630 <i>atg1-S34A GFP-Atg8::LEU2 ptc2Δ::NAT ptc3Δ::HPH</i>                       | This study |
| GM496 | VDY630 <i>atg1-S34D GFP-Atg8::LEU2 ptc2Δ::NAT ptc3Δ::HPH</i>                       | This study |
| GM497 | VDY630 <i>atg1-T226A GFP-Atg8::LEU2 ptc2Δ::NAT ptc3Δ::HPH</i>                      | This study |
| GM525 | JKM179 <i>GFP-Atg8::LEU2 2XFLAG-Atg1 Atg13::13xmyc::TRP1</i>                       | This study |
| GM528 | JKM179 <i>GFP-Atg8::LEU2 2XFLAG-Atg1-T226A Atg13::13xmyc::TRP1</i>                 | This study |
| GM542 | VDY630 <i>atg1-S390A GFP-Atg8::LEU2</i>                                            | This study |
| GM543 | VDY630 <i>atg1-S34A,S390A GFP-Atg8::LEU2</i>                                       | This study |
| GM550 | JKM179 <i>GFP-Atg8::LEU2 2XFLAG-Atg1 Atg13::13xmyc::TRP1 ptc2Δ::NAT ptc3Δ::HPH</i> | This study |
| GM558 | JKM179 <i>-HOcs [pGAL-ATG13]</i>                                                   | This study |
| GM559 | JKM179 <i>-HOcs [pGAL-ATG13-8SA]</i>                                               | This study |
| GM560 | JKM179 <i>-HOcs ptc2Δ::NAT ptc3Δ::KAN [pGAL-ATG13]</i>                             | This study |

|       |                                                                               |            |
|-------|-------------------------------------------------------------------------------|------------|
| GM561 | JKM179 -HOcs <i>ptc2Δ::NAT ptc3Δ::KAN</i> [pGAL-ATG13-8SA]                    | This study |
| GM562 | VDY630 <i>Atg1-S390A GFP-Atg8::LEU2 ptc2Δ::NAT ptc3Δ::HPH</i>                 | This study |
| GM563 | VDY630 <i>atg1-S34A,S390A GFP-Atg8::LEU2 ptc2Δ::NAT ptc3Δ::HPH</i>            | This study |
| GM581 | VDY630 <i>GFP-Atg8::LEU2</i> [pGAL-ATG13]                                     | This study |
| GM582 | VDY630 <i>GFP-Atg8::LEU2</i> [pGAL-ATG13-8SA]                                 | This study |
| GM583 | VDY630 <i>ptc2Δ::NAT ptc3Δ::HPH GFP-Atg8::LEU2</i> [pGAL-ATG13]               | This study |
| GM584 | VDY630 <i>ptc2Δ::NAT ptc3Δ::HPH GFP-Atg8::LEU2</i> [pGAL-ATG13-8SA]           | This study |
| GM594 | VDY630 <i>atg1-T226A GFP-Atg8::LEU2</i> [pGAL-ATG13]                          | This study |
| GM595 | VDY630 <i>atg1-T226A GFP-Atg8::LEU2</i> [pGAL-ATG13-8SA]                      | This study |
| GM604 | JKM179 <i>ptc2Δ::NAT ptc3Δ::KAN GFP-Atg8::LEU2 atg13-8SA</i>                  | This study |
| GM605 | JKM179 <i>GFP-Atg8::LEU2 10xMYC::Atg13</i>                                    | This study |
| GM611 | JKM179 <i>GFP-Atg8::LEU2 atg13-8SA</i>                                        | This study |
| GM617 | JKM179 <i>GFP-Atg8::LEU2 10xMYC::Atg13 ptc2Δ::NAT ptc3Δ::HPH</i>              | This study |
| GM624 | JKM179 <i>GFP::Atg8::URA3 mCherry::Ape1</i>                                   | This study |
| GM625 | JKM179 <i>GFP::Atg8::URA3 mCherry::Ape1 ptc2Δ::NAT ptc3Δ::KAN bar1Δ::ADE3</i> | This study |
| GM626 | VDY630 <i>GFP-Atg8::LEU2 ape1Δ::KAN</i>                                       | This study |
| GM627 | VDY630 <i>GFP-Atg8::LEU2 atg11Δ::KAN</i>                                      | This study |
| GM628 | VDY630 <i>GFP-Atg8::LEU2 atg19Δ::KAN</i>                                      | This study |
| GM629 | VDY630 <i>ptc2Δ::NAT ptc3Δ::HPH GFP-Atg8::LEU2 ape1Δ::KAN</i>                 | This study |
| GM630 | VDY630 <i>ptc2Δ::NAT ptc3Δ::HPH GFP-Atg8::LEU2 atg11Δ::KAN</i>                | This study |
| GM631 | VDY630 <i>ptc2Δ::NAT ptc3Δ::HPH GFP-Atg8::LEU2 atg19Δ::KAN</i>                | This study |

|         |                                                                                          |            |
|---------|------------------------------------------------------------------------------------------|------------|
| GM632   | JKM179 <i>Atg1::2GFP::URA3</i>                                                           | This study |
| GM634   | JKM179 <i>Atg9::2GFP::URA3 [pRS315 mCherry::Atg8]</i>                                    | This study |
| GM635   | JKM179 <i>Atg11::2GFP::URA3 [pRS315 mCherry::Atg8]</i>                                   | This study |
| GM636   | JKM179 <i>Atg13::2GFP::URA3 [pRS315 mCherry::Atg8]</i>                                   | This study |
| GM637   | JKM179 <i>Atg17::2GFP::URA3 [pRS315 mCherry::Atg8]</i>                                   | This study |
| GM638   | JKM179 <i>ptc2Δ::NAT ptc3Δ::KAN bar1Δ::ADE3 Atg1::2GFP::URA3</i>                         | This study |
| GM640   | JKM179 <i>ptc2Δ::NAT ptc3Δ::KAN bar1Δ::ADE3 Atg9::2GFP::URA3 [pRS315 mCherry::Atg8]</i>  | This study |
| GM641   | JKM179 <i>ptc2Δ::NAT ptc3Δ::KAN bar1Δ::ADE3 Atg11::2GFP::URA3 [pRS315 mCherry::Atg8]</i> | This study |
| GM642   | JKM179 <i>ptc2Δ::NAT ptc3Δ::KAN bar1Δ::ADE3 Atg13::2GFP::URA3 [pRS315 mCherry::Atg8]</i> | This study |
| GM643   | JKM179 <i>ptc2Δ::NAT ptc3Δ::KAN bar1Δ::ADE3 Atg17::2GFP::URA3 [pRS315 mCherry::Atg8]</i> | This study |
| GM646   | JKM179 <i>GFP-Atg8::LEU2 2XFLAG-Atg1 Atg13::13xmyc::TRP1 Ptc2::3XHA::KANMX</i>           | This study |
| GM647   | JKM179 <i>GFP-Atg8::LEU2 2XFLAG-Atg1 Atg13::13xmyc::TRP1 Ptc3::3XHA::KANMX</i>           | This study |
| GM666   | JKM179 <i>GFP-Atg8::LEU2 2XFLAG-atg1-T226A Atg13::13xmyc::TRP1</i>                       | This study |
| GM667   | JKM179 <i>GFP-Atg8::LEU2 2XFLAG-atg1-T226A Atg13::13xmyc::TRP1 Ptc2::3XHA::KANMX</i>     | This study |
| GM668   | JKM179 <i>GFP-Atg8::LEU2 2XFLAG-atg1-T226A Atg13::13xmyc::TRP1 Ptc3::3XHA::KANMX</i>     | This study |
| SEY6210 | <i>MATα leu2-3,112 ura3-52 his3-Δ200 trp1-Δ901 suc2-Δ9 lys2-801 GAL</i>                  |            |
| JM347   | SEY6210 <i>pZEO1-pho8Δ60 pho13Δ pCu405-GFP-ATG8::LEU2</i>                                |            |
| YYY145  | JMY347 <i>ptc3Δ::HPH ptc2Δ::NAT</i>                                                      | This study |
| YYY146  | YYA145 <i>atg13Δ::HIS3</i>                                                               | This study |
| YYY147  | JMY347 <i>atg13Δ::HIS3</i>                                                               | This study |

**Table S2. Plasmids used in this study.**

| <b>Plasmid name</b> | <b>Genotype</b>                                                                          | <b>Source</b>       |
|---------------------|------------------------------------------------------------------------------------------|---------------------|
| bRA89               | [pPGK1::CaCas9::HPHMX BpII]                                                              | Anand et. al, 2017  |
| bRA90               | [pPGK1::CaCas9::LeuMX BpII]                                                              | Anand et. al, 2017  |
| pJH2971             | [pPGK1::CaCas9::KANMX BpII]                                                              |                     |
| pGM041              | bRA89 targeting CAGATGCCCTCTATATACAG (to mutate <i>Atg1-S34</i> )                        | This study          |
| pGM042              | bRA89 targeting GTTCTGCTAATGACGTGTT (to mutate <i>Atg1-T226</i> )                        | This study          |
| pGM044              | bRA90 targeting AGACGAGAAATTAAGAAAAT (to integrate the N'-2XFLAG- <i>Atg1</i> )          | This study          |
| pGM049              | bRA89 targeting ATGAGTCATGGTTGCCGAAG (for N'terminus epitope-tagging of <i>Atg13</i> )   | This study          |
| pGM050              | bRA90 targeting ATGAGTCATGGTTGCCGAAG (for N'terminus epitope-tagging of <i>Atg13</i> )   | This study          |
| pGM057              | bRA90 targeting AGAGGGCATCACTGAGCTCCG (to mutate <i>Atg1-S390</i> )                      | This study          |
| pGM071              | bRA90 targeting GGAGGAACAACGTGAAATAC (for N'terminus epitope-tagging of <i>Ape1</i> )    | This study          |
| pGM072              | pJH2971 targeting ATGAGTCATGGTTGCCGAAG (for N'terminus epitope-tagging of <i>Atg13</i> ) | This study          |
| pJH2668             | pRS316 URA3 GFP-ATG8                                                                     | Kamada et. al, 2010 |
| pJH2663             | pRS416 URA3 GAL1-ATG13                                                                   | Kamada et. al, 2010 |
| pJH2664             | pRS416 URA3 GAL1-ATG13-8SA                                                               | Kamada et. al, 2010 |
| pJH2978             | pRS315 mCherry- <i>Atg8::LEU2</i>                                                        | Kamada et. al, 2010 |

|       |                     |                 |
|-------|---------------------|-----------------|
| LD201 | Atg1-2GFP C.a URA3  | Li et. al, 2015 |
| LD211 | Atg11-2GFP C.a URA3 | Li et. al, 2015 |
| LD213 | Atg13-2GFP C.a URA3 | Li et. al, 2015 |
| LD217 | Atg17-2GFP C.a URA3 | Li et. al, 2015 |



**Table S3. Sequences of DNA oligonucleotides uses in this study**

GM021: Forward primer to amplify a Ptc2 deletion cassette

TGACTATTCCATTGTTGTATAAAATATAGAGAACCAGAAAAAGAAAAATGCGTACGCTGCA  
GGTCGAC

GM022: Reverse primer to amplify a Ptc2 deletion cassette

CGTTCGGTTCGTATATAGGTATGTATATATAATGAAGGATGGAAGATCCTGCAGGTAACT  
GGCTTATC

GM023: Reverse primer to confirm Ptc2 deletion

GGTAAACGCGCAGTTTCTGCG

GM024: Forward primer in NAT drug cassette to confirm deletions

CGCCTCGACATCATCTGC

GM025: Forward primer to amplify a Ptc3 deletion cassette

CAGACGAAGAAGGCCAAGAAGACAAATCGAAGAAAGAGAGATAACATGCGTACGCTGC  
AGGTCGAC

GM026: Reverse primer to amplify a Ptc3 deletion

casseteAACAAAGTTTGACTACTCTTTCGTTGCAAAGTACGGTTCGACAATTTAGCAGGTAA  
ACCTGGCTTATC

GM028: Reverse primer in HPH drug cassette to confirm deletions

AGCACGAGATTCTTCGCC

CSL246: Reverse primer downstream of Ptc2

TCCGGATATCCTGCTGTTGGTAG

GM106: Forward primer to tag Atg13 on its C-terminus using pFA6 plasmids

ATGATGATCTAGTATTTTTTCATGAGTGATATGAACCTTTCTAAAGAAGGTCCGGATCCCCGGG  
TTAATTAA

GM107: Reverse primer to tag Atg13 on its C-terminus using pFA6 plasmids

TTTGATTATTTTTCTTTAGTTGTGCCCTTTAAAATAAACTTTACCATTTGAATTCGAGCTCGT  
TTAAAC

GM108: Forward primer in TRP gene to confirm tagging

TGAAAGTTTGCGGCTTGCAG

GM109: Reverse primer downstream of Atg13 ORF to confirm tagging or deletions

TCAGCGGGTGACAAATAAGC

GM148: Forward primer upstream of Atg1 ORF

CACACAACCTCTGTGAACC

GM149: Reverse primer in Atg1 ORF

CGGACGCTAACTGCTGTAA

GM150: Forward primer upstream of Atg1 ORF  
GGCGGTAATGTAAGGAAAACCC

GM175: Forward Cas9 gRNA primer to target Atg1-S34 CAGATGCCCTCTATATACAGGTTTT

GM176: Reverse Cas9 gRNA primer to target Atg1-S34 CTGTATATAGAGGGCATCTGGATCA

GM177: 80mer repair primer to introduce Atg1-S34A mutation with Cas9  
ACCGCTGAGAAAGAAATCGGAAAGGGTGCTTTTGCAACAGTGTATAGAGGGCATCTGACAT  
CCGACAAATCTCAGCATGT

GM179: 80mer repair primer to introduce Atg1-S34D mutation with Cas9  
ACCGCTGAGAAAGAAATCGGAAAGGGTGAATTTGCAACAGTGTATAGAGGGCATCTGACAT  
CCGACAAATCTCAGCATGT

GM180: Forward primer to screen for Atg1 S34 mutants  
TTGCAACAGTGTATAGAGGG

GM181: Forward primer in Atg1 ORF  
CTCTTTTACAACACCAGACGAG

GM195: Forward Cas9 gRNA primer to target Atg1T226  
GTTTCTGCTAATGACGTGTTGTTTT

GM196: Reverse Cas9 gRNA primer to target Atg1-T226  
AACACGTCATTAGCAGAAACGATCA

GM197: 80mer repair primer to introduce Atg1-T226A mutation with Cas9  
TTCGGGTTTGCAAGATTTTGGCAAACACCTCTTTGGCCGAAGCTCTTTGTGGCTCACCATTA  
TATATGGCACCAGAAAT

GM198: Forward primer to screen for Atg1-T226A mutants  
AACACCTCTTTGGCCGAA

GM199: Reverse primer in Atg1 ORF  
CCGATTTCTTCTCTACCACCAC

GM200: Forward primer in Atg1 ORF  
GGTTCATAGAGACATCAAGCC

VE087: Forward primer to amplify an Atg13 deletion cassette  
TCTTGAAAAGAAAGCAGAACATACAGCCCGGTTGAATAGCATGAGTCATGCGTACGCTGCA  
GGTCGAC

VE088: Reverse primer to amplify an Atg13 deletion cassette  
GATTATTTTCTTTAGTTGTGCCCTTTAAAATAAAACTTTACCATTTTTAATCGATGAATTCGA  
GCTCG

GM316: Forward Cas9 gRNA primer to target the N terminus of Atg1 for tagging  
AGACGAGAAATTAAGAAAATGTTTT

GM317: Reverse Cas9 gRNA primer to target the N terminus of Atg1 for tagging  
ATTTTCTTAATTTCTCGTCTGATCA

GM320: Forward primer upstream of Atg1 ORF  
CCATACCGTTAAAGAAGCAAGC

GM321: Forward primer upstream of Atg1 ORF  
ACCAAGGCCATCTTTTACC

GM342: Forward Cas9 gRNA primer to target the N terminus of Atg13 for tagging  
ATGAGTCATGGTTGCCGAAGGTTTT

GM343: Reverse Cas9 gRNA primer to target the N terminus of Atg1 for tagging  
ATGAGTCATGGTTGCCGAAGGTTTT

GM344: Forward primer upstream of Atg13 ORF  
GTTACAGAAAGAGGCGAGAAG

GM345: Reverse primer in Atg13 ORF  
TCGATAAGCCAACGTTCCATC

GM372: 80mer repair primer to introduce Atg1-S390A  
CATCAATCAATGGCAGATAATCCGGCGGAGCTCTCCGATGCCCTCAAGAACGCTAATATATT  
AACTGCCCCAGCCGTTAA

GM373: Forward primer to screen for Atg1-S390 mutations  
AATCCGGCGGAGCTCTC

GM374: Reverse primer in Atg1 ORF  
GCACCACCAAACAATCTCG

GM375: Forward primer in Atg1 ORF  
GATCCAGCCCAAAGAATAGG

GM376: Forward Cas9 gRNA primer to target Atg1-S390  
GAGGGCATCACTGAGCTCCGGTTTT

GM377: Reverse Cas9 gRNA primer to target Atg1-S390  
CGGAGCTCAGTGATGCCCTCGATCA

GM395: Forward primer upstream of Atg1 ORF  
CGAGCATCTCATAAAGGAGCTT

GM429: Forward primer to amplify a deletion cassette targeting the N terminus of Atg13

ACCAGGTCCAGACACAACAACAAAGACAGATACCTGATAGGAGATCTCTTTATGCGGCATC  
AGAGCAGAT

GM430: Reverse primer to amplify a deletion cassette targeting the N terminus of Atg13  
TATGGTTGTCTGATAGGTATCCTACTTTTTATGAAAGAACTTCAAATGCTATTTACACCGCA  
GGTAAT

GM431: Forward primer in Atg13 ORF  
GGACAAAGTGATCAAGACATAG

GM432: Reverse primer in Atg13 ORF  
TTCGCCTGAGCTTGAAAGG

GM433: Forward primer in URA3 ORF to screen for deletions  
TTGGCAGCAACAGGACTAG

GM434: Forward primer in Atg13 ORF  
GGACAAAGTGATCAAGACATAG

GM435: Reverse primer in Atg13 ORF  
GCATCACACCAACTGCAT

GM436: Forward primer in Atg13 ORF  
GTCTCGGTATCATACAGACGTG

GM437: Forward primer in Atg13 ORF  
AGTATGAGCTCCAACACTACGG

GM439: Forward primer in Atg13 ORF  
CGGTGGGAATTCATCTACTAGT

GM442: Forward primer to amplify an mCherry fragment to tag Ape1 on N terminus  
TTAGTGCAATTGTAGAAACCTGCACAACCAACAAAATTAAGAAAAAAGAATGGTTAGCAA  
AGGCGAGGA

GM443: Reverse primer to amplify an mCherry fragment to tag Ape1 on N terminus  
AGCATCTGCAGAGTTTTCTTCAATTGTTCTAGGATTTACGTTGTTCCCTCgtaattaaccagaccgtca  
ccCTTGACAGTTCATCCATAC

GM444: Forward Cas9 gRNA primer targeting the N terminus of Ape1  
GGAGGAACAACGTGAAATACGTTTT

GM445: Reverse Cas9 gRNA primer targeting the N terminus of Ape1  
GTATTTACGTTGTTCCCTCCGATCA

GM446: Reverse primer in mCherry  
GAGGAATCTTGCGTAACGG

GM447: Forward primer upstream of Ape1 ORF  
GGTGATGCTGTTTTGCACC

GM448: Forward primer upstream of Ape1 ORF  
GACATACACTGTATAGAGCCTG

GM449: Forward primer in mCherry  
TCGAGGATGGAGGGGTTGTGA

GM454: Reverse primer in Ape1 ORF  
TCGAGGATGCACCACGAAT

GM456: Reverse primer to amplify MYC tag for N terminus tagging of Atg13  
AAGCTGTCTATCAATTGAAGGACTTGCTTCTCGATGTCCTCTTCGGCAACGGAACCACCGGA  
ACCACCGTGATTGATTAATTTTTGTTACCG

GM457: Forward primer to amplify MYC tag for N terminus tagging of Atg13  
TCTTGAAAAGAAAGCAGAACATACAGCCCGGTTGAATAGCATGAGTCATGCGGATCCCCGG  
GTTAATTAA

GM472: Forward primer to amplify an Ape1 deletion cassette  
TTAGTGCAATTGTAGAAACCTGCACAACCAACAAAATTAAGAAAAAAGACGGATCCCCGG  
GTTAATTAA

GM473: Reverse primer to amplify an Ape1 deletion cassette  
AAAAGGATAAAGAAACAGAAATCAAAAGAAATAAAAAGAGTGTGGCAAAGAATTTCGAGC  
TCGTTTAAAC

DW270: Forward primer to amplify an Atg11 deletion cassette  
GTGTACTGTTGTTGTTTCGGAAAGTACTTCTTTTATTTTCTTTTATAACATCATGCGTACGCTGCA  
GGTCGAC

DW271: Reverse primer to amplify an Atg11 deletion cassette  
TAGATACATAATTAATCTTGTCAATTTGTGACAAACGTTTAGCACTGTTCAATCGATGAATT  
CGAGCTCG

DW272: Forward primer upstream of Atg11 ORF  
GTACGGCTCTGATAGATCCGC

VE076: Forward primer to create an Atg19 deletion cassette  
TTGCGGCGGCACTTGCTTCAGTAACGCCAAAGGAGAGTTCTGGTAAATGCGTACGCTGCAG  
GTCGAC

VE077: Reverse primer to amplify an Atg19 deletion cassette  
TGTTGATGTGAAAAGGTAATGCTGTATAAAAATAGAGTTTGACCTAATCGATGAATTC  
GAGCTCG

VE053: Forward primer upstream of Atg19 ORF  
CTGTAAATGTTGGGCAACTC

GM498: Forward primer to tag Ptc2 on its C terminus  
CCGAGAATGACAGTAACACTGACCACAAGGCCGGCCGTTCCCCTTCAAGGTGGTTCCGGT  
GGTCCCAGGATCCCCGGGTTAATTAA

GM499: Reverse primer to tag Ptc2 on its C terminus  
CGTTCGGTTCGTATATAGGTATGTATATATAATGAAGGATGGAAGATCCTGAATTCGAGCTC  
GTTTAAAC

GM500: Forward primer in Ptc2 ORF  
ACGCTGACACAGATGCAGAA

GM501: Forward primer to tag Ptc3 on its C terminus  
ACGGCAAGAATGAAAATGCGAAGAAGGGTCCAAGATTGAAGAAATTGAAGGTGGTTCCGG  
TGGTCCCAGGATCCCCGGGTTAATTAA

GM502: Reverse primer to tag Ptc3 on its C terminus  
AACAAAGTTTGACTACTCTTTCGTTGCAAAGTACGGTTCGACAATATTTAGAATTCGAGCTC  
GTTTAAAC

GM503: Forward primer in Ptc3 ORF  
CAGGTGAGGATAGAACTGGC

GM514: Reverse primer downstream of Ptc2 ORF  
GTAGCGATGGTGGTGGTAG

GM515: Reverse primer downstream of Ptc3 ORF  
GCCGCAAAGATGATCCAGT
